# Supplementary material for: A New Device to Mimic Intermittent Hypoxia in Mice
Source: PubMed Central journal article supplement (PMC3615002; doi:10.1371/journal.pone.0059973), 2013-04-02
Supplement: pone.0059973.s001.pdf [file pone.0059973.s001.pdf]

**Table S1: Evolution of haemoglobin oxygen saturation as a function of the FIO<sub>2</sub> and duration of the hypoxic phase.**

|                                |                       | Cycle 1                  |                         | Cycle 2                  |                         | Cycle 3                  |                         | Cycle 4                  |                            |
|--------------------------------|-----------------------|--------------------------|-------------------------|--------------------------|-------------------------|--------------------------|-------------------------|--------------------------|----------------------------|
|                                |                       | 15 s hypoxia             | 45 s normoxia           | 20 s hypoxia             | 40 s normoxia           | 30 s hypoxia             | 30 s normoxia           | 40 s hypoxia             | 20 s normoxia              |
| <b>Latency (s)</b>             | FIO <sub>2</sub> 12 % | 3.61 ± 0.6               | 10.4 ± 0.9              | 3.99 ± 0.5               | 10.3 ± 0.8              | 4.58 ± 0.7               | 10.8 ± 1                | 4.81 ± 0.7               | 8.75 ± 1.4                 |
|                                | FIO <sub>2</sub> 9 %  | 3.2 ± 0.7                | 8.9 ± 0.9               | 4.7 ± 0.7                | 8.8 ± 0.9               | 2.9 ± 1                  | 8.5 ± 0.9               | 4.6 ± 0.8                | 6.2 ± 1.7                  |
|                                | FIO <sub>2</sub> 6 %  | 2.3 ± 0.4                | 11.2 ± 0.7              | 2.7 ± 1.3                | 10.7 ± 1                | 2.9 ± 2                  | 9.5 ± 0.9               | 5.9 ± 0.6                | 7.4 ± 1.5                  |
| <b>Time to peak (s)</b>        | FIO <sub>2</sub> 12 % | 21.78 ± 1*               | 38.6 ± 0.8 *            | 26.3 ± 1 *               | 33.63 ± 1.4 *           | 36.2 ± 0.9*              | 24 ± 1.1 *              | 43.9 ± 0.8*              | 11.2 ± 1.4*                |
|                                | FIO <sub>2</sub> 9 %  | 20.7 ± 1*                | 40.8 ± 0.7 *            | 24.1 ± 1 *               | 34.1 ± 1.3 *            | 35.7 ± 1.1*              | 26.1 ± 0.9*             | 41.6 ± 1.7*              | 13.8 ± 1.7 *               |
|                                | FIO <sub>2</sub> 6 %  | 23.9 ± 0.9*              | 36.5 ± 1.3 *            | 28 ± 1.3 *               | 32.2 ± 1.8 *            | 36.6 ± 2.3*              | 27.8 ± 1*               | 40.1 ± 2*                | 12.6 ± 1.5*                |
| <b>Amplitude of change (%)</b> | FIO <sub>2</sub> 12 % | -19.9 ± 1.7 <sup>§</sup> | 20.7 ± 1.6 <sup>§</sup> | -23.3 ± 2.7 <sup>§</sup> | 22.9 ± 2.5 <sup>§</sup> | -24.8 ± 1.6 <sup>§</sup> | 22.1 ± 2 <sup>§</sup>   | -24.5 ± 2 <sup>§</sup>   | 11.25 ± 1.52† <sup>§</sup> |
|                                | FIO <sub>2</sub> 9 %  | -28 ± 1.9 <sup>§</sup>   | 28.4 ± 2.1 <sup>§</sup> | -30.9 ± 2.3 <sup>§</sup> | 30 ± 1.9 <sup>§</sup>   | -32.6 ± 2.1 <sup>§</sup> | 28.1 ± 2.2 <sup>§</sup> | -29.6 ± 2.2 <sup>§</sup> | 17 ± 2.8† <sup>§</sup>     |
|                                | FIO <sub>2</sub> 6 %  | -41.5 ± 2.1 <sup>§</sup> | 40.1 ± 2.2 <sup>§</sup> | -40.1 ± 1.9 <sup>§</sup> | 36.7 ± 2.1 <sup>§</sup> | -39.4 ± 1.8 <sup>§</sup> | 35.9 ± 2 <sup>§</sup>   | -33.8 ± 3.3 <sup>§</sup> | 16.1 ± 2.4† <sup>§</sup>   |

Saturation was measured during four consecutive cycles of 60 s during which the hypoxic phase was progressively lengthened (15, 20, 30 and 40 s). Latency, time to peak change and amplitude of change were measured in 7 animals (mean±se) at different FIO<sub>2</sub> (6, 9 and 12%). Comparisons were made using a one-way ANOVA followed by Newman-Keuls test. p <0,05 \* between each hypoxic phase duration, † between 40 s hypoxic phase and the others, § between each FIO<sub>2</sub>.
