# Supplementary material for: A New Device to Mimic Intermittent Hypoxia in Mice
Source: PubMed Central journal article supplement (PMC3615002; doi:10.1371/journal.pone.0059973), 2013-04-02
Supplement: pone.0059973.s002.pdf [file pone.0059973.s002.pdf]

**Table S2: Effect of position on the change in haemoglobin oxygen saturation.**

|                                |          | 15s hypoxia / 45s normoxia |              | 20s hypoxia / 40s normoxia |              | 30s hypoxia / 30s normoxia |              | 40s hypoxia / 20s normoxia |              |
|--------------------------------|----------|----------------------------|--------------|----------------------------|--------------|----------------------------|--------------|----------------------------|--------------|
|                                | Position | Desaturation               | Resaturation | Desaturation               | Resaturation | Desaturation               | Resaturation | Desaturation               | Resaturation |
| <b>Latency (s)</b>             | Box 1    | 3.8 ± 0.7                  | 11.4 ± 0.5   | 3.7 ± 0.7                  | 10.8 ± 0.7   | 5.4 ± 1                    | 10.8 ± 0.7   | 8.4 ± 1.3                  | 10.6 ± 0.4   |
|                                | Box 3    | 3.4 ± 0.6                  | 11.5 ± 1     | 4.3 ± 0.4                  | 12.2 ± 1.4   | 4.4 ± 0.4                  | 11.7 ± 1     | 9.5 ± 1.5                  | 7.7 ± 2.2    |
|                                | Box 5    | 1.8 ± 1.2                  | 12.4 ± 0.6   | 4.1 ± 1.2                  | 11.7 ± 0.7   | 5.9 ± 0.8                  | 10.2 ± 1.5   | 11 ± 0.7                   | 7.7 ± 1.8    |
| <b>Time to nadir (s)</b>       | Box 1    | 22.6 ± 0.6                 | 42.3 ± 3.8   | 27.2 ± 0.4                 | 33.5 ± 0.4   | 35.3 ± 0.7                 | 24.8 ± 0.8   | 42.2 ± 1.2                 | 10.8 ± 1.4   |
|                                | Box 3    | 23.1 ± 0.9                 | 36.8 ± 0.8   | 27.9 ± 1.2                 | 31.4 ± 1     | 37.2 ± 0.8                 | 24.4 ± 0.8   | 39 ± 2.5                   | 13.1 ± 2.1   |
|                                | Box 5    | 24.7 ± 0.5                 | 35.5 ± 0.6   | 27.6 ± 1.2                 | 32.9 ± 0.3   | 34.3 ± 1.8                 | 26.7 ± 1.6   | 36.7 ± 2.3                 | 16.7 ± 2     |
| <b>Amplitude of change (%)</b> | Box 1    | -19.6 ± 1.1                | 19.2 ± 1.6   | -22.3 ± 0.6                | 22 ± 0.6     | -23.8 ± 1.6                | 22.6 ± 1.1   | -16.9 ± 1.4*               | 9.5 ± 2*     |
|                                | Box 3    | -27.1 ± 2                  | 26.7 ± 2     | -25.7 ± 2                  | 25.6 ± 2.3   | -22.5 ± 1.3                | 21.1 ± 1.6   | -14.9 ± 3*                 | 12.3 ± 5.2*  |
|                                | Box 5    | -26 ± 1.3                  | 25.4 ± 1.9   | -25.2 ± 2                  | 25.6 ± 2     | -23.4 ± 1                  | 24.3 ± 1.5   | -13.6 ± 0.7*               | 11.7 ± 2*    |

Values of latency, time to peak change and amplitude of change measured during the third cycle with 4 different hypoxic-phase durations. FIO<sub>2</sub>: 12%. Values are expressed as mean ± SD of 7 animals. One-way ANOVA followed by Newman-Keuls test was used for comparison. There were no statistically significant differences according to position; \* indicates significant difference (p<0.05) vs the other hypoxic phase durations.
